# Supplementary material for: Battle for the thermostat: Gender and the effect of temperature on cognitive performance
Source: PLOS journal article supplement (doi:10.1371/journal.pone.0216362), 2019-05-22
Supplement: S1 (10.1371/journal.pone.0216362.s001) [file f-22091-supplementary-material-Chang-et_al-S1_Table-journal.pone.0216362.s001.pdf]

Chang, Tom Y.; Kajackaite, Agne

**Article — Published Version**

## Battle for the thermostat: Gender and the effect of temperature on cognitive performance

PLoS ONE

**Provided in Cooperation with:**  
WZB Berlin Social Science Center

*Suggested Citation:* Chang, Tom Y.; Kajackaite, Agne (2019) : Battle for the thermostat: Gender and the effect of temperature on cognitive performance, PLoS ONE, ISSN 1932-6203, Public Library of Science, San Francisco, CA, Vol. 14, Iss. 5, pp. 1-10, <https://doi.org/10.1371/journal.pone.0216362>

This Version is available at:  
<https://hdl.handle.net/10419/198594>

**Standard-Nutzungsbedingungen:**

Die Dokumente auf EconStor dürfen zu eigenen wissenschaftlichen Zwecken und zum Privatgebrauch gespeichert und kopiert werden.

Sie dürfen die Dokumente nicht für öffentliche oder kommerzielle Zwecke vervielfältigen, öffentlich ausstellen, öffentlich zugänglich machen, vertreiben oder anderweitig nutzen.

Sofern die Verfasser die Dokumente unter Open-Content-Lizenzen (insbesondere CC-Lizenzen) zur Verfügung gestellt haben sollten, gelten abweichend von diesen Nutzungsbedingungen die in der dort genannten Lizenz gewährten Nutzungsrechte.

**Terms of use:**

*Documents in EconStor may be saved and copied for your personal and scholarly purposes.*

*You are not to copy documents for public or commercial purposes, to exhibit the documents publicly, to make them publicly available on the internet, or to distribute or otherwise use the documents in public.*

*If the documents have been made available under an Open Content Licence (especially Creative Commons Licences), you may exercise further usage rights as specified in the indicated licence.*

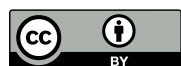

<https://creativecommons.org/licenses/by/4.0/>

**S1 Table. Probit and OLS estimates of subject characteristics and temperature**

|                             | (1)      | (2)                    | (3)      | (4)           | (5)      | (6)               | (7)      | (8)        | (9)      | (10)               | (11)     | (12)                |
|-----------------------------|----------|------------------------|----------|---------------|----------|-------------------|----------|------------|----------|--------------------|----------|---------------------|
|                             |          | <u>Gender (male=1)</u> |          | <u>German</u> |          | <u>Econ Major</u> |          | <u>Age</u> |          | <u>Enjoys Math</u> |          | <u>Enjoys Words</u> |
| <i>Temperature</i>          | -0.009   |                        | -0.0066  |               | -0.006   |                   | 0.0103   |            | 0.0148   |                    | 0.0106   |                     |
|                             | [0.0106] |                        | [0.0116] |               | [0.0108] |                   | [0.0398] |            | [0.0237] |                    | [0.0199] |                     |
| <i>Temperature &lt; 20</i>  |          | 0.2227                 |          | 0.2256        |          | 0.2164            |          | -0.5779    |          | -0.0391            |          | 0.1452              |
|                             |          | [0.1380]               |          | [0.1536]      |          | [0.1391]          |          | [0.5284]   |          | [0.3082]           |          | [0.2553]            |
| <i>Temperature 25 to 30</i> |          | 0.2654                 |          | 0.2836        |          | 0.1576            |          | -0.4116    |          | -0.3378            |          | 0.3291              |
|                             |          | [0.1798]               |          | [0.2043]      |          | [0.1797]          |          | [0.7373]   |          | [0.4042]           |          | [0.3081]            |
| <i>Temperature &gt; 30</i>  |          | 0.0383                 |          | 0.0734        |          | 0.1169            |          | -0.3466    |          | 0.3087             |          | 0.2292              |
|                             |          | [0.1449]               |          | [0.1588]      |          | [0.1480]          |          | [0.5763]   |          | [0.3209]           |          | [0.2725]            |
| <i>Mean Value</i>           |          | 0.59                   |          | 0.79          |          | 0.38              |          | 24.06      |          | 5.99               |          | 7.19                |
| <i>R-squared</i>            | 0.0010   | 0.0056                 | 0.0006   | 0.0058        | 0.0004   | 0.0035            | 0.0001   | 0.0023     | 0.0007   | 0.0048             | 0.0005   | 0.0024              |
| <i>Observations</i>         | 542      | 542                    | 542      | 542           | 542      | 542               | 542      | 542        | 542      | 542                | 542      | 542                 |

The table presents Probit and OLS regression results. Columns 1-6 present the results of a Probit model, while columns 7-12 present the results of an OLS regression. Odd numbered columns use linear temperature; in even numbered columns, temperature bins are used with the range of 20-25 degrees Celsius the reference group. Pseudo R-squared values are provided for the Probit regressions. "German" indicates whether the subject is a native German speaker. "Enjoys Math" and "Enjoys Words" are self-reported measures that can take integer values of 0 to 10. Mean Value is the mean value of the dependent variable. In brackets are robust standard errors. A plus sign by an estimate indicates statistical significance at the 10-percent level, one asterisk at the 5-percent level, and two asterisks at the 1-percent level.
