# Supplementary material for: Battle for the thermostat: Gender and the effect of temperature on cognitive performance
Source: PLOS journal article supplement (doi:10.1371/journal.pone.0216362), 2019-05-22
Supplement: S4 (10.1371/journal.pone.0216362.s004) [file f-22091-supplementary-material-Chang-et_al-S1_Text-journal.pone.0216362.s004.pdf]

Chang, Tom Y.; Kajackaite, Agne

**Article — Published Version**

## Battle for the thermostat: Gender and the effect of temperature on cognitive performance

PLoS ONE

**Provided in Cooperation with:**

WZB Berlin Social Science Center

*Suggested Citation:* Chang, Tom Y.; Kajackaite, Agne (2019) : Battle for the thermostat: Gender and the effect of temperature on cognitive performance, PLoS ONE, ISSN 1932-6203, Public Library of Science, San Francisco, CA, Vol. 14, Iss. 5, pp. 1-10,  
<https://doi.org/10.1371/journal.pone.0216362>

This Version is available at:

<https://hdl.handle.net/10419/198594>

**Standard-Nutzungsbedingungen:**

Die Dokumente auf EconStor dürfen zu eigenen wissenschaftlichen Zwecken und zum Privatgebrauch gespeichert und kopiert werden.

Sie dürfen die Dokumente nicht für öffentliche oder kommerzielle Zwecke vervielfältigen, öffentlich ausstellen, öffentlich zugänglich machen, vertreiben oder anderweitig nutzen.

Sofern die Verfasser die Dokumente unter Open-Content-Lizenzen (insbesondere CC-Lizenzen) zur Verfügung gestellt haben sollten, gelten abweichend von diesen Nutzungsbedingungen die in der dort genannten Lizenz gewährten Nutzungsrechte.

**Terms of use:**

*Documents in EconStor may be saved and copied for your personal and scholarly purposes.*

*You are not to copy documents for public or commercial purposes, to exhibit the documents publicly, to make them publicly available on the internet, or to distribute or otherwise use the documents in public.*

*If the documents have been made available under an Open Content Licence (especially Creative Commons Licences), you may exercise further usage rights as specified in the indicated licence.*

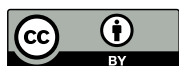

<https://creativecommons.org/licenses/by/4.0/>

## **S3 Instructions of the experiment**

Original instructions were in German.

### **Instructions**

Welcome to our experiment. Please read the instruction carefully. If you have a question, please raise your hand and we will come over to you. Please do not communicate with other participants during the experiment.

This experiment is about temperature.

Your participation is voluntary. You are allowed to leave the room at any time.

Every participant will receive 3EUR for attending, which will be paid out independently of the decisions made in the experiment.

Furthermore, you will be able to earn additional money. At the end of the experiment, you will receive the income you earned over the course of the experiment plus the 3EUR for attending in cash.

Your decisions are private and no other participant will know about them.

The experiment will consist of several parts and a post-questionnaire. You will receive instructions for each part of the experiment before the part of the experiment starts.

Do you have any questions?

### Part 1

Below are several problems that vary in difficulty. Try to answer as many as you can in 5 minutes. For each question you answer correctly, you will receive 1EUR.

A bat and a ball cost 1.10EUR in total. The bat costs 1.00EUR more than the ball. How much does the ball cost? \_\_\_\_\_

If it takes 5 machines 5 minutes to make 5 widgets, how long would it take 100 machines to make 100 widgets? \_\_\_\_\_

In a lake, there is a patch of lily pads. Every day, the patch doubles in size. If it takes 48 days for the patch to cover the entire lake, how long would it take for the patch to cover half of the lake?

\_\_\_\_\_

## Part 2

Your task is to add up five two-digit numbers (see the example below). Solve as many problems as you can. You will have 5 minutes from the time the experimenter tells you to start. You may use scratch paper, but use of a calculator is not allowed.

You will receive 0.10EUR per correct answer.

| EXAMPLE   |    |    |    |    | ANSWER |
|-----------|----|----|----|----|--------|
| 88        | 21 | 79 | 78 | 16 | 282    |
| QUESTIONS |    |    |    |    |        |
| 18        | 76 | 37 | 51 | 23 |        |
| 73        | 70 | 27 | 50 | 35 |        |
| 43        | 69 | 31 | 71 | 96 |        |
| 63        | 79 | 48 | 12 | 13 |        |
| 28        | 23 | 71 | 28 | 52 |        |
| 31        | 64 | 48 | 48 | 45 |        |
| 22        | 61 | 55 | 18 | 35 |        |
| 53        | 23 | 16 | 40 | 75 |        |
| 24        | 15 | 48 | 50 | 21 |        |
| 27        | 36 | 25 | 76 | 25 |        |
| 42        | 43 | 43 | 17 | 10 |        |
| 86        | 46 | 50 | 54 | 31 |        |
| 53        | 51 | 94 | 97 | 58 |        |
| 22        | 98 | 87 | 77 | 56 |        |
| 21        | 39 | 45 | 13 | 21 |        |
| 35        | 35 | 46 | 78 | 96 |        |
| 95        | 35 | 31 | 21 | 67 |        |
| 79        | 35 | 76 | 63 | 78 |        |
| 33        | 90 | 62 | 80 | 68 |        |
| 91        | 26 | 48 | 32 | 77 |        |
| 46        | 49 | 25 | 23 | 74 |        |
| 80        | 88 | 50 | 92 | 90 |        |
| 32        | 94 | 77 | 45 | 90 |        |
| 66        | 86 | 67 | 79 | 44 |        |
| 35        | 71 | 80 | 79 | 37 |        |
| 30        | 49 | 59 | 66 | 97 |        |
| 76        | 42 | 85 | 97 | 20 |        |
| 78        | 82 | 90 | 70 | 12 |        |
| 18        | 61 | 70 | 84 | 27 |        |
| 14        | 91 | 64 | 17 | 64 |        |

|    |    |    |    |    |  |
|----|----|----|----|----|--|
| 79 | 17 | 68 | 92 | 48 |  |
| 53 | 95 | 29 | 59 | 78 |  |
| 18 | 89 | 76 | 55 | 46 |  |
| 76 | 87 | 89 | 69 | 26 |  |
| 72 | 85 | 93 | 46 | 58 |  |
| 49 | 41 | 93 | 70 | 86 |  |
| 68 | 86 | 30 | 84 | 21 |  |
| 51 | 50 | 29 | 89 | 47 |  |
| 97 | 41 | 52 | 53 | 16 |  |
| 34 | 63 | 86 | 36 | 43 |  |
| 28 | 58 | 56 | 98 | 46 |  |
| 66 | 68 | 96 | 16 | 23 |  |
| 82 | 59 | 43 | 51 | 55 |  |
| 77 | 61 | 78 | 39 | 46 |  |
| 69 | 36 | 41 | 58 | 61 |  |
| 90 | 45 | 27 | 90 | 86 |  |
| 83 | 36 | 63 | 40 | 55 |  |
| 13 | 27 | 84 | 63 | 96 |  |
| 34 | 10 | 24 | 25 | 56 |  |
| 75 | 74 | 57 | 45 | 74 |  |

## Part 3

For the set of letters below, construct as many words as possible within 5 minutes. Rewards are increasing in the length of the word, with the Nth letter in a word worth N points. That is while a two letter word is worth  $1+2=3$  points, a three letter word is worth  $1+2+3=6$  points, a four letter word is worth  $1+2+3+4=10$  points, a five letter word is worth  $1+2+3+4+5=15$  points and so on (note: 1 letter words will not count). Each point is worth 0.02EUR, so a two letter word is worth 0.06EUR, a three letter word is worth 0.12EUR, a four letter word is worth 0.20EUR, a five letter word is worth 0.30EUR, a six letter word is worth 0.42EUR, a seven letter word is worth 0.56EUR, an eight letter word is worth 0.72EUR, and a nine letter word is worth 0.90EUR. Note each letter can be used only once in one particular word. It means if you already have used an “A” in a word, you cannot use it again in this word. However, you can use it again in the next word.

Letters (in alphabetical order) are:

# ADEHINRSTU

Please write down the words you constructed:

[illegible]

### Post-Questionnaire

Please describe briefly how you made your decisions in this experiment:

---

---

---

---

Gender:

- ☐ Male  
☐ Female

Age: \_\_\_\_\_

Major: \_\_\_\_\_

What is your native language? \_\_\_\_\_

On a scale from 0 to 10 how much did you enjoy the math task (1-not at all, 10-very much)?

\_\_\_\_\_

On a scale from 0 to 10 how much did you enjoy the words task (1-not at all, 10-very much)?

\_\_\_\_\_
